# Supplementary material
Source: ML conference proceedings conference paper supplement (https://openaccess.thecvf.com/content/CVPR2025/html/Akkerman_InterDyn_Controllable_Interactive_CVPR_2025_paper.html)
Supplement: Supplementary file 1 [file Akkerman_InterDyn_Controllable_Interactive_CVPR_2025_supplemental.pdf]

# InterDyn: Controllable Interactive Dynamics with Video Diffusion Models

## Supplementary Material

### A. Ablation study

We use binary hand masks as our control signal due to their widespread availability via methods such as GroundingDINO [52] and SAM2 [65]. However, other control signals—such as skeletons or meshes—might provide richer controllability, since they encode pseudo-3D information and fine-grained correspondences across frames.

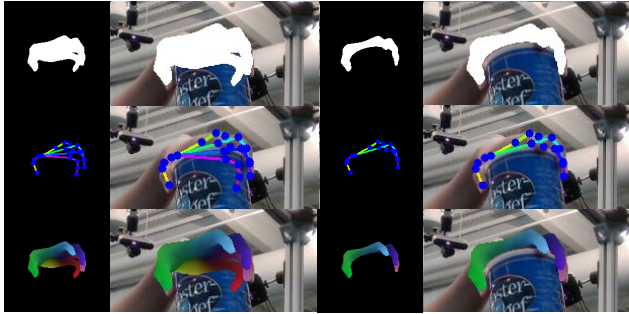

Figure S1. **Evaluated control signals.** From top to bottom: binary mask, joints in the style of OpenPose [9], and colored mesh [61]. Left: w/o object occlusions. Right: w/ object occlusions.

We evaluate the impact of our control signal on performance using the DexYCB dataset [11]. It provides 8,000 videos of hands grasping an object, along with ground-truth 3D hand/object poses/meshes. DexYCB uses the parametric human hand model MANO [67], rendered here as (i) a binary mask (similar to our SSV2 control signal), (ii) joints similar to OpenPose [9], and (iii) a colormap based on [61], see Fig. S1. Additionally, when generating hand masks for SSV2 with SAM2, hand-held objects provide an object contour in the hand mask, inadvertently providing InterDyn with information on the trajectory and shape of the object (a limitation we share with our baseline CosHand [70]). To evaluate its impact, we train separate InterDyn versions on DexYCB, where we render the control signal either with or without the contour of hand-held objects, see Fig. S1.

We present the ablation results in Tab. S1, which indicate that both the type of control signal and contour-leaking effect have minimal impact on image quality, spatio-temporal dynamics, and motion fidelity. These findings softly hint that maintaining hand consistency and driving object interactions does not heavily depend on detailed control signals, rather it does on the video generation model’s implicit understanding of interactive dynamics. This is great news, highlighting the potential of using simple, readily available control signals to generate high-quality video outputs.

### B. State comparison

For completeness, we also compare against CosHand [70] for the second frame of each video and compare these results with the baselines reported in [70], see Tab. S2. For MCVD, UCG, IPix2Pix, TCG, and CosHand (the first five rows), we adopt the results reported in [70] without retraining. Since CosHand does not provide, nor specify, an exact validation split, these numbers are not directly comparable. We also run CosHand on our own validation set.

| Method                     | SSIM $\uparrow$ | PSNR $\uparrow$ | LPIPS $\downarrow$ |
|----------------------------|-----------------|-----------------|--------------------|
| MCVD [70, 75]              | 0.231           | 8.75            | 0.307              |
| UCG [66, 70]               | 0.340           | 12.08           | 0.124              |
| IPix2Pix [7, 70]           | 0.289           | 9.53            | 0.296              |
| TCG [66, 70]               | 0.234           | 9.05            | 0.221              |
| CosHand [70]               | 0.414           | 13.72           | <b>0.116</b>       |
| CosHand [70] (our val-set) | 0.698           | 20.55           | 0.194              |
| Ours (256 $\times$ 256)    | <u>0.785</u>    | <u>23.93</u>    | 0.127              |
| Ours (256 $\times$ 384)    | <b>0.796</b>    | <b>24.37</b>    | <u>0.122</u>       |

Table S2. **State comparison on the SSV2 dataset.** We compare InterDyn with CosHand and other static baseline methods for generating a single future frame. We report results for InterDyn at two resolutions: 256 $\times$ 256 (matching CosHand) and 256 $\times$ 384 (matching SVD’s prior).

| Control | Occlusion    | SSIM $\uparrow$  |                  | PSNR $\uparrow$  |                  | LPIPS $\downarrow$ |                  | FVD $\downarrow$ |                  | Motion Fidelity $\uparrow$ [93] |                  |
|---------|--------------|------------------|------------------|------------------|------------------|--------------------|------------------|------------------|------------------|---------------------------------|------------------|
|         |              | 256 $\times$ 256 | 256 $\times$ 384 | 256 $\times$ 256 | 256 $\times$ 384 | 256 $\times$ 256   | 256 $\times$ 384 | 256 $\times$ 256 | 256 $\times$ 384 | 256 $\times$ 256                | 256 $\times$ 384 |
| Mask    | $\times$     | <b>0.829</b>     | <u>0.847</u>     | 24.08            | 24.75            | 0.123              | <u>0.121</u>     | <u>39.94</u>     | 41.99            | 0.666                           | 0.670            |
| Joints  | $\times$     | 0.827            | 0.846            | 24.00            | 24.72            | 0.124              | 0.122            | 40.02            | <u>41.17</u>     | <u>0.673</u>                    | <u>0.676</u>     |
| Mesh    | $\times$     | <u>0.828</u>     | <u>0.847</u>     | <u>24.14</u>     | <u>24.83</u>     | <u>0.122</u>       | <u>0.121</u>     | 41.99            | 42.26            | 0.663                           | 0.665            |
| Mask    | $\checkmark$ | <b>0.829</b>     | <u>0.847</u>     | <b>24.15</b>     | 24.79            | <u>0.122</u>       | <u>0.121</u>     | <b>37.64</b>     | 41.18            | <b>0.675</b>                    | 0.672            |
| Joints  | $\checkmark$ | 0.827            | 0.846            | 24.05            | 24.69            | 0.124              | 0.122            | 44.07            | 41.41            | 0.665                           | <u>0.676</u>     |
| Mesh    | $\checkmark$ | <b>0.829</b>     | <b>0.848</b>     | <b>24.15</b>     | <b>24.86</b>     | <b>0.121</b>       | <b>0.119</b>     | 40.11            | <b>38.83</b>     | <b>0.675</b>                    | <b>0.680</b>     |

Table S1. **Ablation on control signal.** We train and evaluate InterDyn on DexYCB [11]. We ablate: the type of control signal (mask, joints, and a colored mesh rendering), the presence of object occlusions in the control signal, and two image resolutions (256 $\times$ 256 & 256 $\times$ 384).

## C. Limitations

InterDyn performs best on translations relative to the camera; dropping objects, moving objects toward or away from the camera, and picking up objects. InterDyn struggles with complex non-translational interactions (e.g. throwing one object at another, burying an object, or poking a tower of stacked objects). It also underperforms in scenarios where depth is ambiguous in the input image, see Fig. S2.

We report the 20 video classes on which InterDyn 256×384 performs best and worst in terms of motion fidelity, alongside the number of videos for each class in the validation set and the average motion fidelity score for that class, see Tab. S3. We generally notice that InterDyn performs less effectively on underrepresented classes within the dataset, while at the same time, many of these underrepresented classes involve complex dynamics, such as spinning, burying, or folding objects.

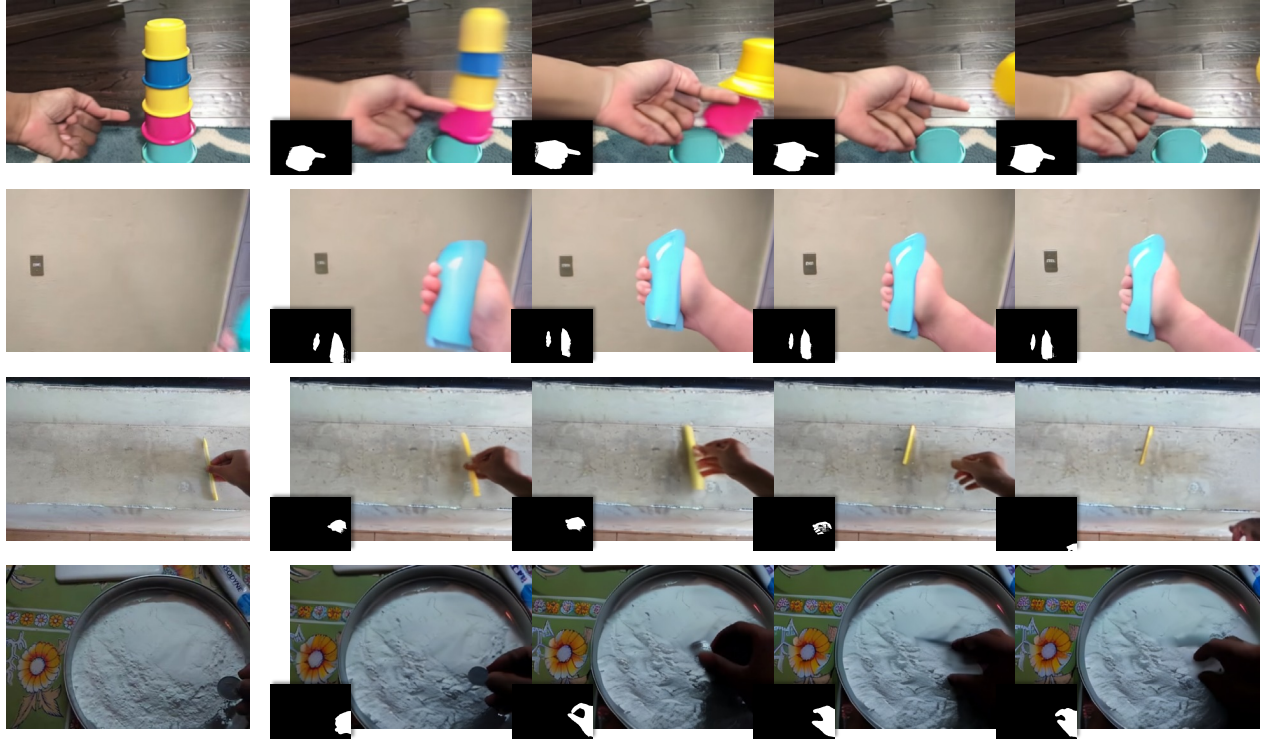

Figure S2. **Limitations of InterDyn.** We show challenging scenarios in which InterDyn underperforms, such as (from top to bottom): object consistency in highly dynamic scenarios, no object in the first frame, depth ambiguity, and burying an object. **Q Zoom in** for details.

| Label                                                                             | Count | MF ↑ (avg.) |
|-----------------------------------------------------------------------------------|-------|-------------|
| Moving something down                                                             | 182   | 0.86        |
| Pulling something from right to left                                              | 57    | 0.84        |
| Moving something up                                                               | 197   | 0.82        |
| Pulling something from left to right                                              | 83    | 0.82        |
| Holding something over something                                                  | 165   | 0.80        |
| Holding something                                                                 | 103   | 0.80        |
| Moving something across a surface without it falling down                         | 26    | 0.79        |
| Pushing something from left to right                                              | 123   | 0.79        |
| Holding something in front of something                                           | 138   | 0.78        |
| Pushing something from right to left                                              | 122   | 0.77        |
| Putting something on a surface                                                    | 85    | 0.77        |
| Moving something across a surface until it falls down                             | 28    | 0.77        |
| Lifting something with something on it                                            | 369   | 0.77        |
| Squeezing something                                                               | 216   | 0.77        |
| Lifting something up completely without letting it drop down                      | 66    | 0.75        |
| Throwing something in the air and letting it fall                                 | 6     | 0.75        |
| Moving something closer to something                                              | 105   | 0.75        |
| Holding something next to something                                               | 135   | 0.75        |
| Putting something that can't roll onto a slanted surface, so it stays where it is | 15    | 0.75        |
| Trying to bend something unbendable so nothing happens                            | 74    | 0.74        |

(a) **Top 20 categories.** Contains many translation dynamics with respect to the camera, such as moving something up or from left to right.

| Label                                                              | Count | MF ↑ (avg.) |
|--------------------------------------------------------------------|-------|-------------|
| Spinning something so it continues spinning                        | 51    | 0.47        |
| Poking something so that it falls over                             | 42    | 0.46        |
| Pulling something out of something                                 | 33    | 0.46        |
| Folding something                                                  | 187   | 0.46        |
| Poking something so it slightly moves                              | 71    | 0.45        |
| Spinning something that quickly stops spinning                     | 47    | 0.45        |
| Taking something out of something                                  | 66    | 0.45        |
| Unfolding something                                                | 122   | 0.44        |
| Putting something, something, and something on the table           | 60    | 0.44        |
| Piling something up                                                | 27    | 0.43        |
| Something being deflected from something                           | 10    | 0.41        |
| Poking something so lightly that it doesn't or almost doesn't move | 83    | 0.41        |
| Burying something in something                                     | 4     | 0.41        |
| Showing something next to something                                | 19    | 0.40        |
| Pushing something so it spins                                      | 23    | 0.39        |
| Poking something so that it spins around                           | 7     | 0.39        |
| Putting number of something onto something                         | 5     | 0.37        |
| Poking a stack of something so the stack collapses                 | 8     | 0.34        |
| Showing something on top of something                              | 14    | 0.34        |
| Wiping something off of something                                  | 9     | 0.32        |

(b) **Bottom 20 categories.** Contains very complex dynamics such as spinning, burying, or showing an object from behind something.

Table S3. **Motion fidelity for different action classes on the Something-Something-v2 dataset.** The table shows the top and bottom 20 categories, together with the number of samples for that category in the validation set.



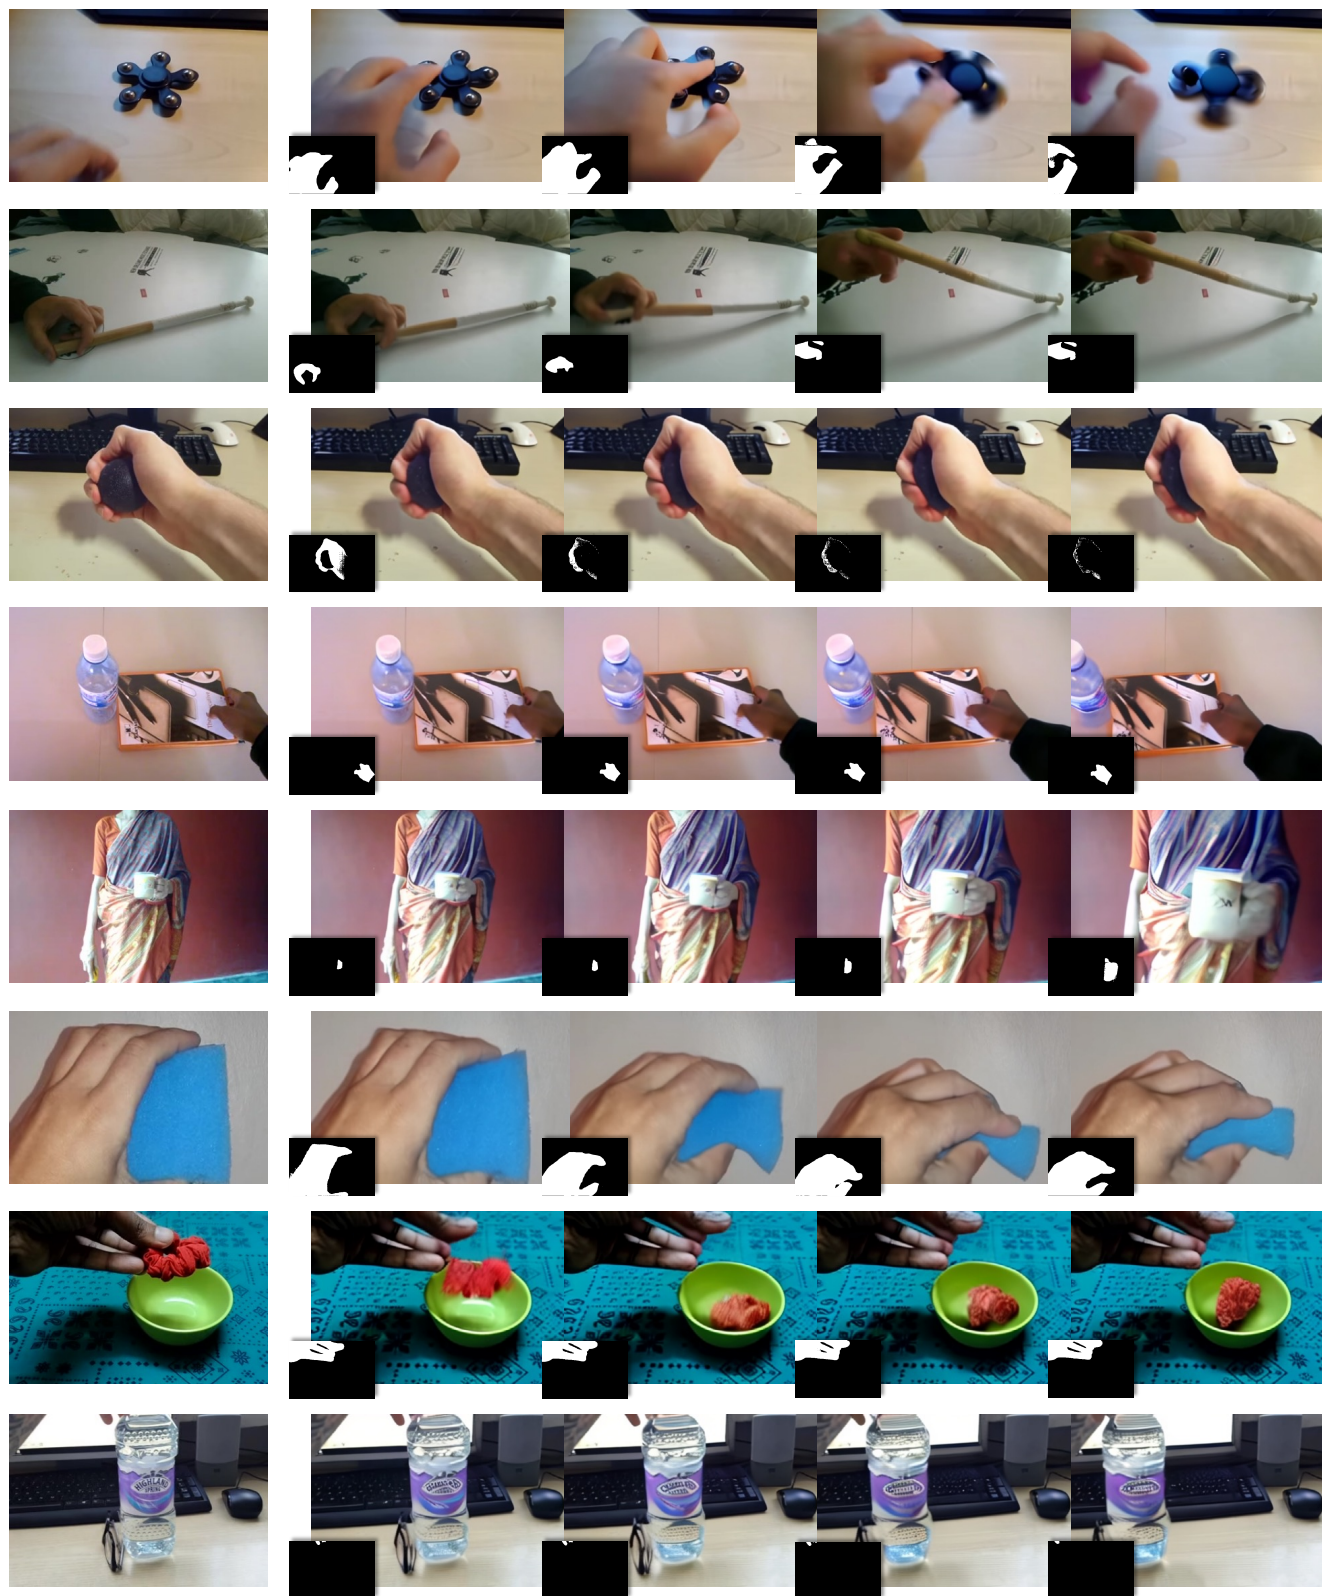

Figure S3. **Additional qualitative results on SSV2.** We show multiple challenging examples, such as (from top to bottom): spinning a fidget spinner, tilting a sleek ridged object, squeezing a ball despite receiving an incomplete control signal, hand object-object interaction, zooming in, squeezing a sponge, dropping a hairband, or hand object-object interaction despite receiving a sparse control signal.

## D. Additional Results

We show additional qualitative examples in Fig. S3.

## E. Pretending class

Similar to our baseline CosHand [70], we removed the “pretending” class from SSV2 for training and validation, to avoid introducing ambiguous training signals. To compare its performance on this class to our results in Tab. 1, we

run InterDyn on the “pretending” class in the validation split (828 samples for  $256\times 384$  and 1156 for  $256\times 256$ ), see Tab. S4. While the generations stay consistent in terms of image quality, we notice that motion fidelity is lower. Unfortunately, since FID, KID, FVD, and KVD compare distributions and are heavily dependent on the number of data samples, we cannot directly compare these metrics to those reported in Tab. 1.

| Method                        | SSIM $\uparrow$ | PSNR $\uparrow$ | LPIPS $\downarrow$ | FID $\downarrow$ | KID $\downarrow$ | FVD $\downarrow$ | KVD $\downarrow$ | Motion Fidelity $\uparrow$ [93] |
|-------------------------------|-----------------|-----------------|--------------------|------------------|------------------|------------------|------------------|---------------------------------|
| Seer [23]                     | 0.357           | 9.42            | 0.657              | 74.86            | 0.060            | 640.06           | 147.07           | —                               |
| DynamiCrafter [89] $^\dagger$ | —               | —               | —                  | 34.96            | 0.016            | 314.05           | 34.22            | —                               |
| CosHand-Independent [70]      | 0.620           | 16.79           | 0.310              | <b>9.85</b>      | <b>0.003</b>     | 123.59           | 15.97            | 0.396                           |
| CosHand-Autoregressive [70]   | 0.534           | 14.80           | 0.410              | 24.10            | 0.012            | 139.07           | 11.18            | 0.512                           |
| Ours $256\times 256$          | <u>0.666</u>    | <u>18.52</u>    | <u>0.256</u>       | <u>14.29</u>     | <u>0.004</u>     | <b>49.02</b>     | <u>-0.131</u>    | <u>0.573</u>                    |
| Ours $256\times 384$          | <b>0.683</b>    | <b>18.99</b>    | <b>0.249</b>       | 17.39            | <u>0.004</u>     | <u>64.18</u>     | <b>-0.450</b>    | <b>0.572</b>                    |

Table S4. **Quantitative comparison on the “pretending” class of SSV2.** We compare against Seer [23], DynamiCrafter [89] and two video extensions of our baseline CosHand [70]. Methods denoted with  $^\dagger$  do not use SSV2 as their training dataset.
